# Supplementary material
Source: publisher site journal article supplement (https://www.dovepress.com/get_supplementary_file.php?f=208865.xlsx)
Supplement: Supplementary file 1 [file get_supplementary_file.php]

## Sheet: EOPE vs N
	Mean (Log2)		log FC
miRNA	EOPE	N (≤33 weeks)	EOPE vs N (≤33 weeks)
hsa-miR-223-3p	7.21	4.95	2.26
hsa-miR-490-3p	3.66	1.58	2.08
hsa-miR-874-3p	4.59	2.8	1.79
hsa-miR-126-3p	4.96	3.32	1.64
hsa-miR-190a-5p	5.01	3.46	1.55
hsa-miR-23a-3p	5.45	3.9	1.54
hsa-miR-324-3p	3.52	2	1.53
hsa-miR-16-5p	6.75	5.46	1.3
hsa-miR-484	4.2	3	1.2
hsa-miR-302f	4.45	3.32	1.13
hsa-miR-33a-5p	5.72	4.64	1.08
hsa-miR-27b-3p	4.01	3	1.01
hsa-miR-153-3p	4.2	5.21	-1.01
hsa-miR-205-5p	4.2	5.21	-1.01
hsa-miR-144-3p	3.79	4.8	-1.02
hsa-miR-3613-3p	4.11	5.13	-1.02
hsa-miR-4787-3p	4.37	5.39	-1.02
hsa-miR-18a-5p	4.01	5.04	-1.03
hsa-miR-182-5p	3.2	4.24	-1.04
hsa-miR-941	3.9	4.95	-1.05
hsa-miR-3195	3.52	4.58	-1.06
hsa-miR-548c-5p+hsa-miR-548o-5p+hsa-miR-548am-5p	3.79	4.85	-1.07
hsa-miR-629-5p	4.45	5.52	-1.07
hsa-miR-455-5p	3.01	4.08	-1.08
hsa-miR-184	3.9	5	-1.1
hsa-miR-519e-3p	4.29	5.39	-1.1
hsa-miR-493-3p	2.79	3.9	-1.12
hsa-miR-520e	2.2	3.32	-1.12
hsa-miR-374b-5p	3.66	4.8	-1.14
hsa-miR-106b-5p	3.37	4.52	-1.15
hsa-miR-337-3p	2.52	3.7	-1.18
hsa-miR-370-5p	3.9	5.08	-1.18
hsa-miR-4284	3.66	4.85	-1.2
hsa-miR-517a-3p	4.45	5.67	-1.22
hsa-miR-151a-5p	3.2	4.46	-1.26
hsa-miR-455-3p	2.79	4.08	-1.3
hsa-miR-483-5p	2.2	3.58	-1.38
hsa-miR-431-5p	3.37	4.9	-1.53
hsa-miR-758-5p	1.2	2.8	-1.6

## Sheet: LOPE vs N
	Mean (Log2)		log FC
miRNA	LOPE	N (≥34 weeks)	LOPE vs N (≥34 weeks)
hsa-miR-151b	4.22	2.93	1.29
hsa-miR-187-3p	2.93	4.3	-1.36
hsa-miR-202-3p	4.16	2.71	1.45
hsa-miR-214-3p	2.93	4.03	-1.1
hsa-miR-219b-3p	5.57	4.45	1.12
hsa-miR-297	4.62	3.13	1.5
hsa-miR-3185	4.09	2.93	1.15
hsa-miR-32-5p	4.67	3.58	1.09
hsa-miR-339-3p	2.93	4.21	-1.28
hsa-miR-373-3p	3.22	4.3	-1.07
hsa-miR-375	3.76	5.17	-1.41
hsa-miR-4431	3.57	4.65	-1.08
hsa-miR-4485-3p	3.46	4.45	-0.99
hsa-miR-4516	3.22	4.45	-1.22
hsa-miR-488-3p	2.93	4.58	-1.65
hsa-miR-494-5p	3.09	4.37	-1.29
hsa-miR-496	2.09	3.45	-1.36
hsa-miR-497-5p	4.41	3.3	1.11
hsa-miR-563	4.01	5.13	-1.11

## Sheet: EOPE vs LOPE
	Mean (Log2)		Log FC
miRNA	LOPE	EOPE	EOPE vs LOPE
hsa-let-7f-5p	5.69	4.45	-1.25
hsa-miR-136-5p	4.52	3.37	-1.15
hsa-miR-195-5p	3.57	4.72	1.15
hsa-miR-2116-5p	4.01	5.15	1.14
hsa-miR-25-3p	7.09	5.98	-1.11
hsa-miR-26b-5p	5.6	4.52	-1.07
hsa-miR-296-3p	4.46	3.01	-1.46
hsa-miR-302d-3p	8.05	9.22	1.17
hsa-miR-3179	4.52	3.52	-1
hsa-miR-499a-5p	5.55	6.96	1.41
hsa-miR-505-3p	3.22	1.79	-1.44
hsa-miR-510-3p	4.97	3.66	-1.31
hsa-miR-517b-3p	2.93	1.79	-1.15
hsa-miR-640	4.09	5.29	1.2
hsa-miR-655-3p	4.09	3.01	-1.08

## Sheet: EOPE vs N & EOPE vs LOPE
	Mean (Log2)			log FC
miRNA	LOPE	EOPE	N (≤33 weeks)	EOPE vs N (≤33 weeks)	EOPE vs LOPE
hsa-miR-208b-5p	4.52	3.52	4.85	-1.33	-1
hsa-miR-562	4.01	3.01	4.32	-1.31	-1
hsa-miR-615-5p	5.05	4.01	5.04	-1.03	-1.04
hsa-miR-204-5p	3.57	2.52	4.08	-1.56	-1.05
hsa-miR-139-5p	3.85	2.79	4.8	-2.02	-1.07
hsa-miR-449c-5p	4.46	3.37	4.95	-1.58	-1.09
hsa-miR-624-3p	4.62	3.52	4.75	-1.23	-1.1
hsa-miR-299-3p	4.89	3.79	4.8	-1.02	-1.11
hsa-miR-1286	5.09	3.9	4.9	-1	-1.19
hsa-miR-1275	4.29	3.01	4.52	-1.51	-1.28
hsa-miR-424-5p	3.85	2.52	3.9	-1.38	-1.33
hsa-miR-1252-5p	4.41	3.01	4.32	-1.31	-1.4
hsa-miR-320d	4.81	3.37	4.39	-1.02	-1.44
hsa-miR-452-5p	3.67	1.79	3.58	-1.8	-1.89
hsa-miR-378b	3.76	1.2	3.17	-1.97	-2.56

## Sheet: LOPE vs N & EOPE vs LOPE 
	Mean (Log2)			log FC
miRNA	LOPE	EOPE	N (≥34 weeks)	LOPE vs N (≥34 weeks)	EOPE vs LOPE
hsa-miR-451a	12.75	10.15	11.06	1.68	-2.6
hsa-miR-379-5p	3.93	2.79	2.71	1.22	-1.15
hsa-miR-26a-5p	3.67	4.72	4.71	-1.04	1.05
hsa-miR-376b-3p	2.35	3.37	3.93	-1.58	1.02
has-miR-150-5p	3.35	4.45	5.21	-1.58	1.1
has-miR-517c-3p	3.67	4.72	4.77	-1.1	1.05

## Sheet: LOPE vs N & EOPE vs N
	Mean (Log2)				log FC
miRNA	LOPE	EOPE	N (≤33 weeks)	N (≥34 weeks)	EOPE vs N (≤33 weeks)	LOPE vs N (≥34 weeks)
hsa-miR-504-5p	2.09	3.01	2	3.3	1.01	-1.21
hsa-miR-2113	3.76	3.01	4.7	4.88	-1.69	-1.12
hsa-miR-374c-5p	2.09	2.2	3.9	3.3	-1.7	-1.21

## Sheet: common amongst all groups
	Mean (Log2)				log FC
miRNA	LOPE	EOPE	N (≤33 weeks)	N (≥34 weeks)	EOPE vs N (≤33 weeks)	LOPE vs N (≥34 weeks)	EOPE vs LOPE
hsa-miR-122-5p	0.76	5.72	0.2	4.65	5.72	-3.88	4.96
hsa-miR-3605-3p	4.16	3.01	4.32	3.13	-1.31	1.03	-1.15
